# Supplementary material for: Crystal structure, magnetotransport properties, and electronic band structure of V1−xTixSe2 single crystals
Source: Royal Society of Chemistry journal article supplement (doi:10.1039/d4ta03663h), 2024-01-01
Supplement: d4ta03663h1.pdf [file d4ta03663h1.pdf]

## Crystal structure, Magnetotransport properties, and Electronic band structure of $V_{1-x}Ti_xSe_2$ single crystals

Lina Sang<sup>1,4</sup>, Meng Yuan<sup>1</sup>, Jinshi Zhao<sup>1</sup>, Guangsai Yang<sup>1†</sup>, Frank Fei Yun<sup>2</sup>, Zhi  
Li<sup>2,3,4†</sup>, and Xiaolin Wang<sup>2,4†</sup>

<sup>1</sup>Tianjin Key Laboratory of Film Electronic and Communication Devices, School of Integrated Circuit Science and Engineering, Tianjin University of Technology, Tianjin 300384, China

<sup>2</sup>Institute for Superconducting and Electronic Materials (ISEM), Australian Institute for Innovative Materials (AIMM), University of Wollongong, Wollongong, NSW 2525, Australia

<sup>3</sup>School of Materials Science and Engineering, The University of New South Wales, Kensington, New South Wales 2052, Australia

<sup>4</sup>ARC Centre of Excellence in Future Low-Energy Electronics Technologies (FLEET), University of Wollongong, Wollongong, NSW 2525, Australia

†To whom correspondence should be addressed: ygsai@email.tjut.edu.cn; zhi.li5@unsw.edu.au and xiaolin@uow.edu.au

Figure S1 shows the  $VSe_2$  and  $TiSe_2$  single crystals synthesized by using the conventional solid-state method. The SEM-EDS mapping of  $V_{0.5}Ti_{0.5}Se_2$  presented in Figure S1b indicates that the Ti, V, and Se elements were evenly distributed over the surface.

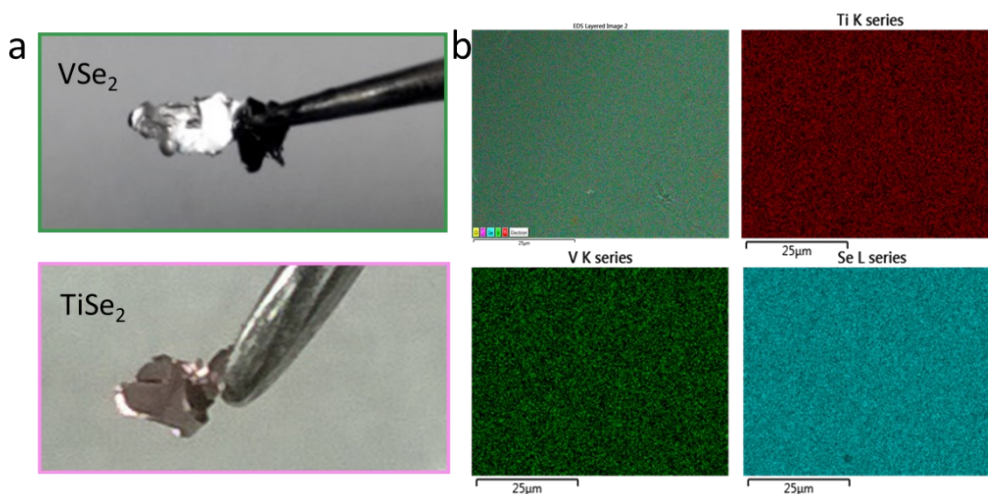

Figure S1  $V_{1-x}Ti_xSe_2$  single crystal: a.  $VSe_2$  and  $TiSe_2$  single crystals. b. Scanning

electron microscope (SEM) image and energy dispersive spectroscopy (EDS) mapping of Ti, V, and Se for  $V_{0.5}Ti_{0.5}Se_2$ .

The universal effect that deficiency in the chalcogen site could change the shape of the Fermi surface and the transport properties. Since the deficiency in the chalcogen site dopes electron to the system and leads lower resistivity, and the electron doping effect can also shift the Fermi surface.<sup>1,2</sup> The content of V, Ti and Se in  $V_{1-x}Ti_xSe_2$  samples was acquired on a Thermo Fisher Scientific iCAP RQ inductive (America) coupled plasma mass spectrometer (ICP-MS), as shown in the table below. The ICP-MS results of  $V_{0.5}Ti_{0.5}Se_2$  analysis reveals that the ratios of V: Ti: Se were 1: 1: 4 and 1: 1: 4 denoted as S1 and S2. The Se contents were calculated to be 7.55 and 7.58 mg  $g^{-1}$  in S1 and S2, respectively. The results indicate a slight deficiency of Se (0.3%) in the samples, but the molar ratios are generally consistent with the molecular formula.

**Tabl S1. Elemental compositions of the samples.**

ICP-MS results of  $V_{0.5}Ti_{0.5}Se_2$

| Sample | Element | Exp | Cal   | Mass Ratio(wt%) |
|--------|---------|-----|-------|-----------------|
| S1     | V       | 0.5 | 0.500 | 0.122           |
|        | Ti      | 0.5 | 0.528 | 0.121           |
|        | Se      | 2.0 | 1.988 | 0.755           |
| S2     | V       | 0.5 | 0.500 | 0.122           |
|        | Ti      | 0.5 | 0.528 | 0.121           |
|        | Se      | 2.0 | 1.994 | 0.758           |

#### References

1. Rukshana Pervin<sup>1</sup>, Manikandan Krishnan, Arumugam Sonachalam, and Parasharam M. Shirage<sup>1</sup>, *J Mater Sci* (2019) 54:11903–11912
2. J. S. Chen, J. K. Wang, S. V. Carr, S. C. Vogel, O. Gourdon, P. Dai, E. Morosan, *Phys. Rev. B*, **2015**, 91, 045125.
